# Supplementary material for: Luminescent and magnetic [TbEu] 2D metal–organic frameworks
Source: Royal Society of Chemistry journal article supplement (doi:10.1039/d3dt00367a), 2023-01-01
Supplement: d3dt00367a1.pdf [file d3dt00367a1.pdf]

## Supplementary Information

### Luminescent and magnetic [TbEu] 2D Metal-Organic Frameworks

E. Bartolomé<sup>a\*</sup>, A. Arauzo<sup>b</sup>, S. Fuertes<sup>c</sup>, L. Navarro-Spreafico<sup>d</sup>, P. Sevilla<sup>a</sup>, H. Fernández Cortés,<sup>d</sup> N. Settineri,<sup>e</sup> S. J. Teat,<sup>e</sup> E. C. Sañudo<sup>d,f\*</sup>

<sup>a</sup> Escola Universitària Salesiana de Sarrià (EUSS), Passeig Sant Joan Bosco 74, 08017 Barcelona, Spain

<sup>b</sup> Instituto de Nanociencia y Materiales de Aragón (INMA), CSIC-Universidad de Zaragoza, and Departamento de Física de la Materia Condensada, 50009 Zaragoza, Spain

<sup>c</sup> Departamento de Química Inorgánica, Facultad de Ciencias, Instituto de Síntesis Química y Catalisis, Homogénea (ISQCH), CSIC-Universidad de Zaragoza, 50009 Zaragoza, Spain

<sup>d</sup> Secció de Química Inorgànica, Departament de Química Inorgànica i Orgànica Universitat de Barcelona, C/Martí i Franquès, 1-11, 08028 Barcelona, Spain

<sup>e</sup> ALS Berkeley USA

<sup>f</sup> Institut de Nanociència i Nanotecnologia, Universitat de Barcelona, IN2UB. C/Martí i Franquès, 1-11, 08028 Barcelona, Spain

|                                                                                 |             |
|---------------------------------------------------------------------------------|-------------|
| <b>S1. Infrared spectra of Ln 2D MOFs</b>                                       | <b>p. 2</b> |
| <b>S2. PXRD</b>                                                                 | <b>p. 3</b> |
| <b>S3. Tb/Eu ratio analysis</b>                                                 | <b>p. 4</b> |
| <b>S4. Color emission under UV light</b>                                        | <b>p. 4</b> |
| <b>S5. Luminescence lifetime measurements</b>                                   | <b>p. 5</b> |
| <b>S6. Emission of mixed compound Tb<sub>0.9</sub>Eu<sub>0.1</sub></b>          | <b>p. 6</b> |
| <b>S7. Ac susceptibility ox mixed compound Tb<sub>0.9</sub>Eu<sub>0.1</sub></b> | <b>p. 7</b> |
| <b>S8. Bottleneck effect</b>                                                    | <b>p. 8</b> |

## S1. Infrared spectra of Ln 2D MOFs

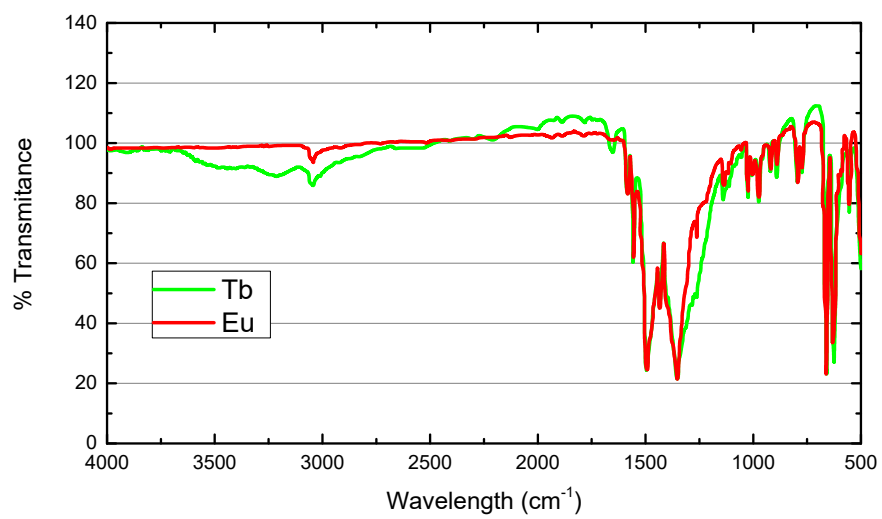

**Figure S1.** Infrared spectra of homometallic Ln 2DMOFs (Ln= Tb, Eu).

## S2. PXRD

Dy

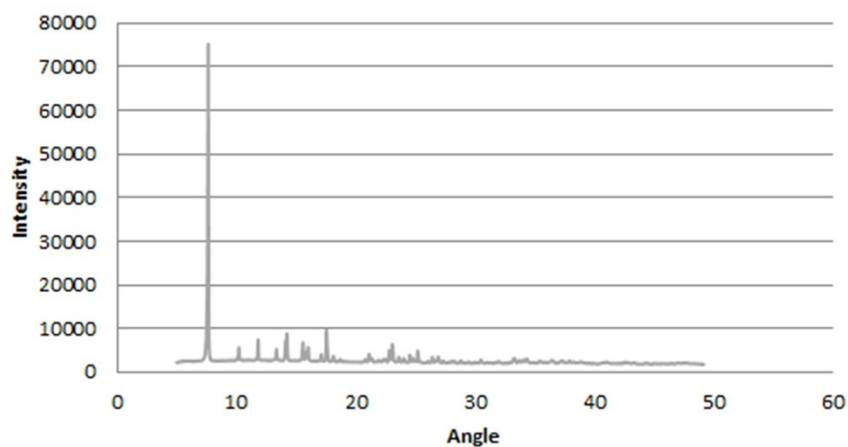

Tb<sub>0.3</sub>Eu<sub>0.7</sub>

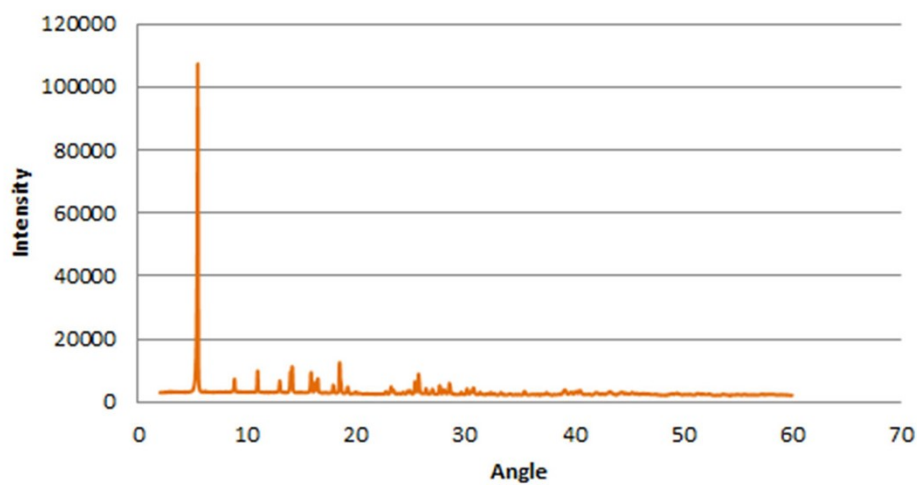

Tb<sub>0.2</sub>Eu<sub>0.8</sub>

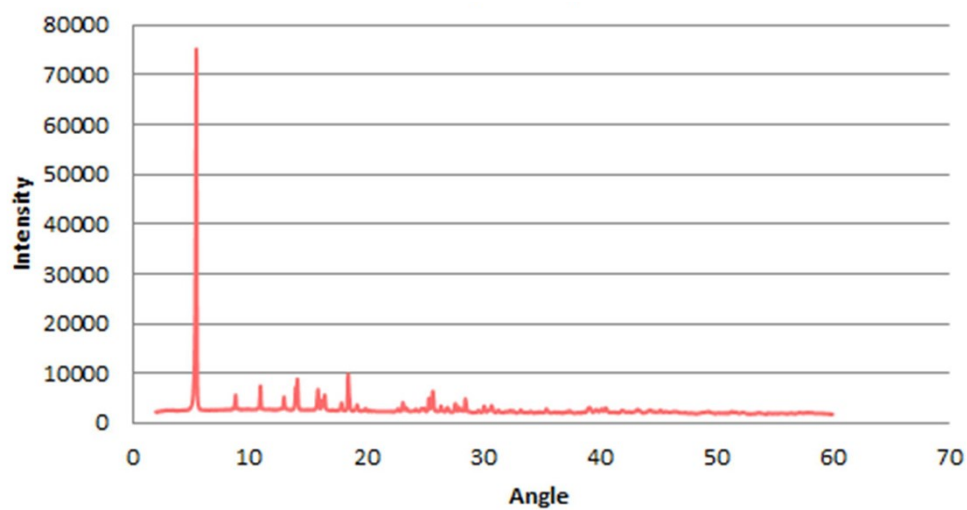

Figure S2. PXRD spectra of the studied mixed compounds (the rest are shown in Fig. 2 of the main paper).

### S3. Tb/Eu ratio analysis

| Sample name        | ICP  |      | SEM-EDS |      | TEM-EDX |      | Fluorescence |      |
|--------------------|------|------|---------|------|---------|------|--------------|------|
|                    | Tb   | Eu   | Tb      | Eu   |         |      | Tb           | Eu   |
| $Tb_xEu_{1-x}$     |      |      |         |      |         |      |              |      |
| $Tb_{0.2}Eu_{0.8}$ | 0.17 | 0.83 | 0.25    | 0.75 |         |      |              |      |
| $Tb_{0.3}Eu_{0.7}$ | 0.28 | 0.72 | 0.36    | 0.64 |         |      |              |      |
| $Tb_{0.4}Eu_{0.6}$ | 0.42 | 0.58 |         |      | 0.42    | 0.58 |              |      |
| $Tb_{0.7}Eu_{0.3}$ | 0.71 | 0.29 |         |      |         |      | 0.73         | 0.27 |
| $Tb_{0.9}Eu_{0.1}$ | 0.86 | 0.14 |         |      |         |      | 0.88         | 0.13 |

Table S3 Tb/Eu ratios determined for the heteronuclear samples by ICP (standard error <2%), SEM-EDS, TEM-EDX and Fluorescence.

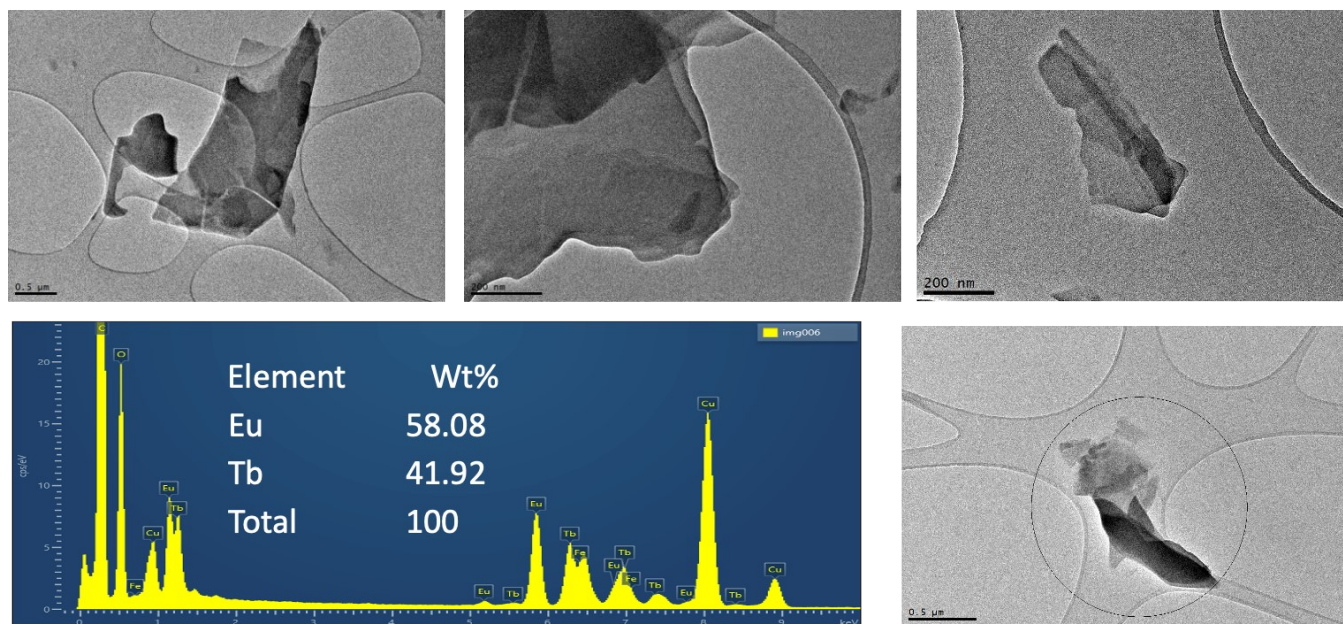

Figure S3. TEM images showing exfoliated flakes of  $Tb_{0.4}Eu_{0.6}$  and EDX analysis.

### S4. Color emission under UV light

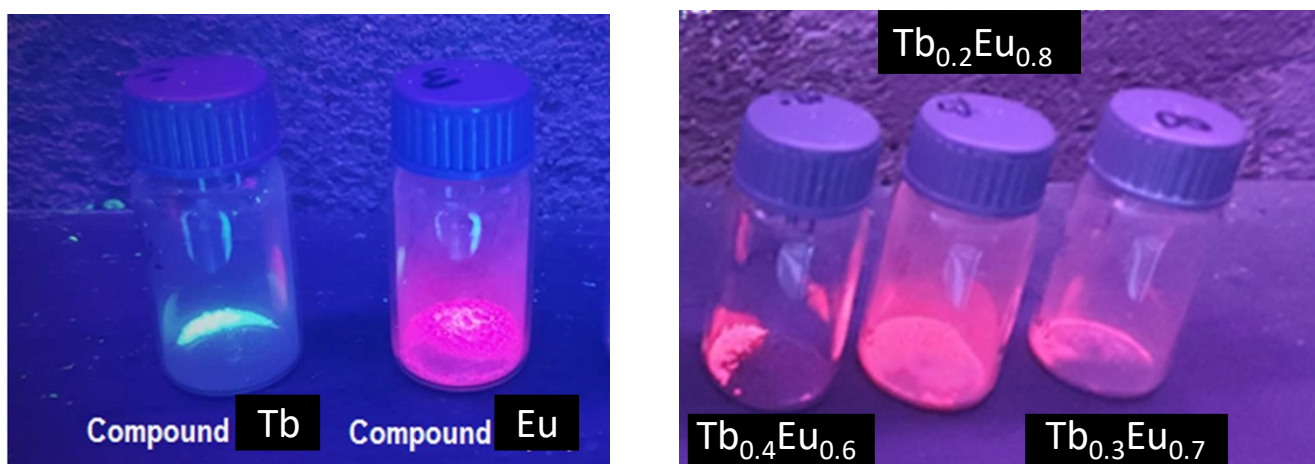

Figure S4. Visible color emission of (left) homonuclear Tb, Eu compounds, and (right) heteronuclear [TbEu] compounds, under UV light.

## S5. Luminescence lifetime measurements

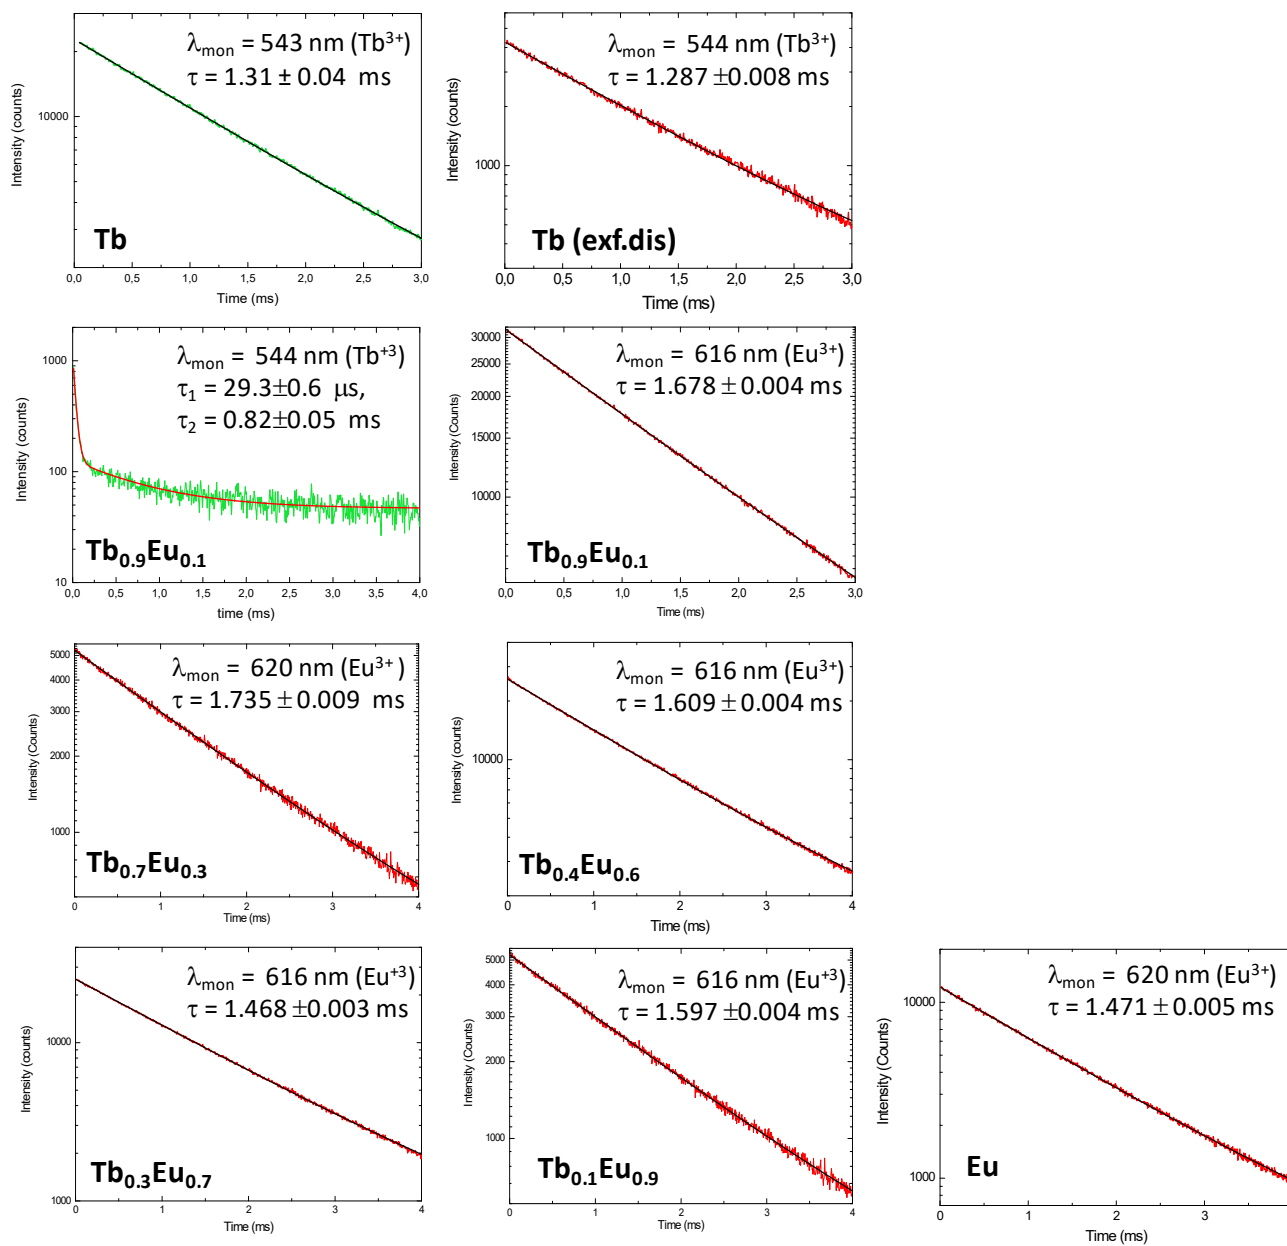

**Figure S5.** Lifetime measurements for homonuclear Tb and Eu compounds, and heterodinuclear Tb<sub>x</sub>Eu<sub>1-x</sub> compounds, excited at  $\lambda_{\text{exc}}=280 \text{ nm}$ . The decay of either the Eu<sup>3+</sup> main peak at 620 nm peak, or the Tb<sup>3+</sup> peak at 544 nm were monitored. For **Tb<sub>0.9</sub>Eu<sub>0.1</sub>** the lifetime data were fit to a biexponential law with two time constants ( $\tau_1$  and  $\tau_2$ ):  $I(t) = A_1 \cdot \exp(-t/\tau_1) + A_2 \cdot \exp(-t/\tau_2) + I_0$ , with  $A_1=1022 \pm 16$ ,  $\tau_1=29.3 \pm 0.6 \text{ } \mu\text{s}$ ,  $A_2=80 \pm 2$ ,  $\tau_2=0.82 \pm 0.05 \text{ } \mu\text{s}$ ,  $I_0=46.5 \pm 0.8$ . For all other compounds the data were fit to an exponential decay law with a single time constant ( $\tau$ ).

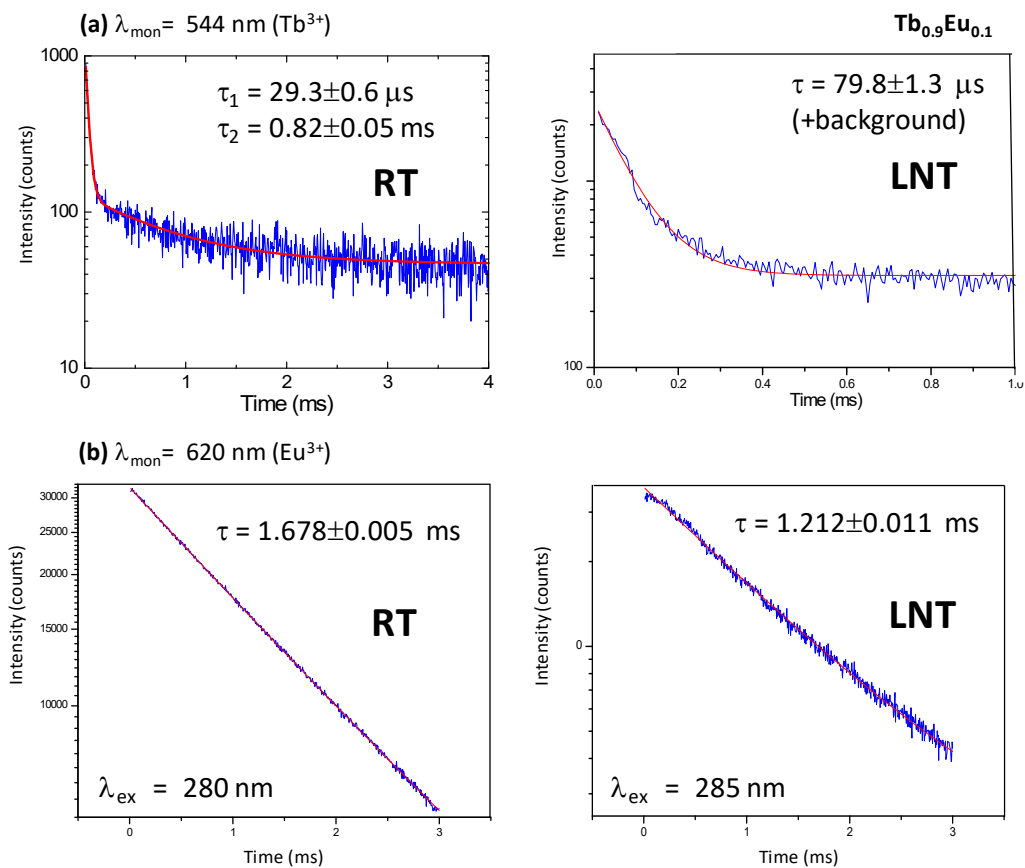

**Figure S6.** Lifetime measurements for heterodinuclear  $\text{Tb}_{0.9}\text{Eu}_{0.1}$  compound, monitored at (a) the  $\text{Tb}^{3+}$  main peak at 544 nm and (b) the  $\text{Eu}^{3+}$  main peak at 620 nm peak at, at (left) room temperature (RT), and (right) liquid nitrogen temperature (LNT).

## S6. Emission of mixed compound $Tb_{0.9}Eu_{0.1}$

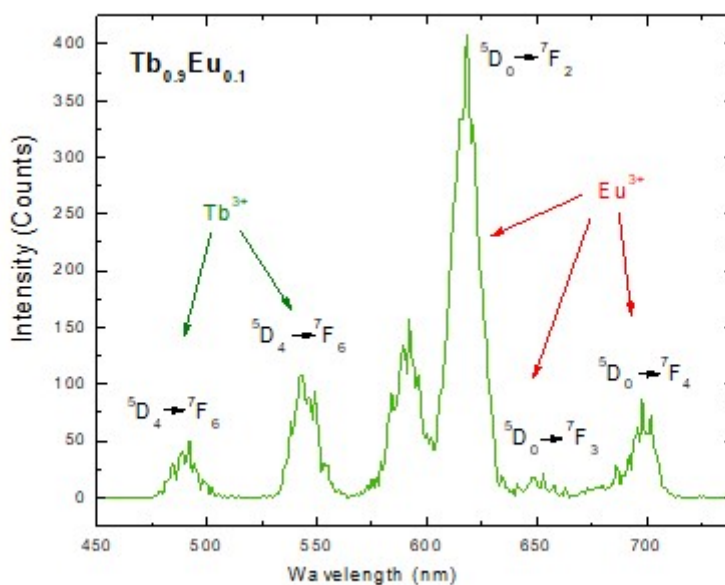

**Figure S7.** Emission spectra of complex  $Tb_{0.9}Eu_{0.1}$  excited at  $\lambda_{exc}=280$  nm, measured in. Fluorolog FL-1057, Jobin Yvon HORIBA. The characteristic emission bands for  $Tb^{3+}$  and  $Eu^{3+}$  are visible.

## S7. Ac susceptibility of mixed compound $Tb_{0.9}Eu_{0.1}$

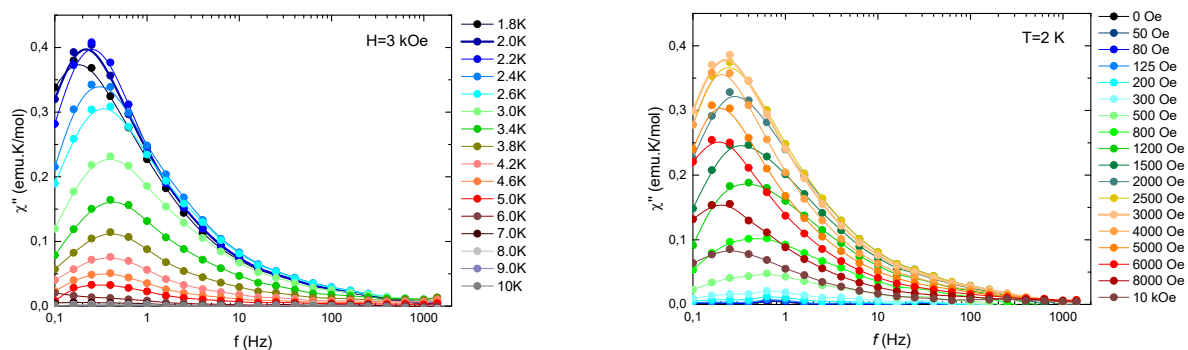

**Figure S8.** Ac susceptibility results. (Left)  $\chi''(f, T)$  at constant magnetic field  $H=3$  kOe and (Right)  $\chi''(f, H)$  at constant  $T=2$  K for mixed compound  $Tb_{0.9}Eu_{0.1}$ .

## S8. Bottleneck effect

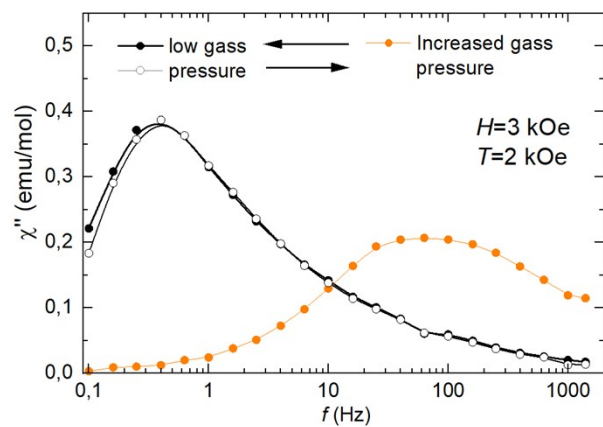

**Fig. S9**  $\chi''(f)$  measurements on pure **Tb** compound at  $H=3$  kOe and  $T=2$  K at different experimental SQUID pressure conditions, showing the influence of the bottleneck effect.
